# Supplementary material for: Comprehensive analysis of new prognostic signature based on ferroptosis-related genes in clear cell renal cell carcinoma
Source: Aging (Albany NY). 2021 Aug 9;13(15):19789–804. doi: 10.18632/aging.203390 (PMC8386570; doi:10.18632/aging.203390)
Supplement: Supplementary Tables [file aging-13-203390-s002.pdf]

## SUPPLEMENTARY TABLES

**Supplementary Table 1. The list of the 64 ferroptosis-related genes from publications.**

| Ferroptosis-related genes | Name                                                         |
|---------------------------|--------------------------------------------------------------|
| ABCC1                     | ATP binding cassette subfamily C member 1                    |
| ACACA                     | Acetyl-CoA carboxylase alpha                                 |
| ACO1                      | aconitase 1                                                  |
| ACSF2                     | acyl-CoA synthetase family member 2                          |
| ACSL3                     | acyl-CoA synthetase long-chain family member 3               |
| ACSL4                     | acyl-CoA synthetase long-chain family member 4               |
| AIFM2                     | apoptosis inducing factor mitochondria associated 2          |
| AKR1C1                    | aldo-keto reductase family 1 member C1                       |
| AKR1C2                    | aldo-keto reductase family 1 member C2                       |
| AKR1C3                    | aldo-keto reductase family 1 member C3                       |
| ALOX12                    | arachidonate 12-lipoxygenase                                 |
| ALOX15                    | arachidonate 15-lipoxygenase                                 |
| ALOX5                     | arachidonate 5-lipoxygenase                                  |
| ATP5MC3                   | ATP synthase membrane subunit c locus 3                      |
| BAP1                      | BRCA1 associated protein 1                                   |
| CARS                      | cysteinyl tRNA synthetase                                    |
| CBS                       | cystathionine beta synthase                                  |
| CD44                      | CD44 molecule                                                |
| CHAC1                     | ChaC glutathione- specific gamma-glutamyl cyclotransferase 1 |
| CISD1                     | CDGSH iron sulfur domain 1                                   |
| CRYAB                     | heat shock protein beta 5                                    |
| CS                        | citrate synthase                                             |
| DMT1                      | ferrous ion membrane transport protein DMT1                  |
| DPP4                      | dipeptidyl-dipeptidase-4                                     |
| EMC2                      | ER membrane protein complex subunit 2                        |
| FADS2                     | fatty acid desaturase 2/acyl-CoA 6-desaturase                |
| FANCD2                    | Fanconi anemia complementation group D2                      |
| FDFT1                     | farnesyl-diphosphate farnesyltransferase 1                   |
| FTH1                      | ferritin heavy chain 1                                       |
| G6PD                      | glucose-6-phosphate dehydrogenase                            |
| GCLC                      | glutamate-cysteine ligase catalytic subunit                  |
| GCLM                      | glutamate-cysteine ligase modifier subunit                   |
| GLS2                      | glutaminase 2                                                |
| GOT1                      | glutamic-oxaloacetic transaminase 1                          |
| GPX4                      | glutathione peroxidase 4                                     |
| GSS                       | glutathione synthetase                                       |
| HMGCR                     | 3-hydroxy-3- methylglutaryl-CoA reductase                    |
| HMOX1                     | heme oxygenase 1                                             |
| HSBP1                     | heat-shock 27-k Da protein 1                                 |
| HSPB1                     | heat shock protein beta 1                                    |
| IREB2                     | iron response element-binding protein 2                      |
| KEAP1                     | kelch-like ECH- associated protein 1                         |
| LPCAT3                    | lysophosphatidylcholine acyltransferase 3                    |
| MT1G                      | metallothionein-1G                                           |
| NCOA4                     | nuclear receptor coactivator 4                               |
| NFE2L2                    | nuclear factor, erythroid 2 like 2                           |

|         |                                                    |
|---------|----------------------------------------------------|
| NFS1    | cysteine desulfurase                               |
| NOX1    | NADPH oxidase 1                                    |
| NQO1    | quinone oxidoreductase-1                           |
| PEBP1   | phosphatidylethanolamine-binding protein 1         |
| PGD     | phosphoglycerate dehydrogenase                     |
| PHKG2   | phosphorylase kinase, g2                           |
| PTGS2   | prostaglandin-endoperoxide synthase 2              |
| RPL8    | ribosomal protein L8                               |
| SAT1    | spermidine/spermine N1-acetyltransferase 1         |
| SLC1A5  | solute carrier family 1 member 5                   |
| SLC7A11 | solute carrier family 7 member 11                  |
| SQLE    | squalene monooxygenase                             |
| STEAP3  | six-transmembrane epithelial antigen of prostate 3 |
| TFRC    | transferrin receptor                               |
| TP53    | tumor protein 53                                   |
| VDAC2   | voltage dependent anion channel 2                  |
| VDAC3   | voltage dependent anion channel 3                  |
| ZEB1    | zinc finger E-box-binding homeobox 1               |

**Supplementary Table 2. Primers of 4 ferroptosis-related genes used in this study.**

| <b>Genes</b> | <b>Primers (5'-3')</b> |
|--------------|------------------------|
| DPP4-F       | TTCAGAACTATTTCGGTCA    |
| DPP4-R       | ATAAAGATTCCTTCCTCCT    |
| NCOA4-F      | TCAACATAGAACGCACAT     |
| NCOA4-R      | AGAACTCCACCAATAGCA     |
| SLC7A11-F    | TATTCTATGTTGCGTCTCG    |
| SLC7A11-R    | TATCATTGTCAAAGGGTGC    |
| CD44-F       | CAGCTCATACCAGCCATCCA   |
| CD44-R       | GCTTGATGACCTCGTCCCAT   |
| Actin-F      | ACACTGTGCCCATCTACG     |
| Actin-R      | TGTCACGCACGATTTC       |
